# Supplementary material for: The prognostic efficacy of cell-free DNA hypermethylation in colorectal cancer
Source: PubMed Central journal article supplement (PMC5805532; doi:10.18632/oncotarget.24097), 2018-01-09
Supplement: oncotarget-09-7010-s001.pdf [file oncotarget-09-7010-s001.pdf]

## The prognostic efficacy of cell-free DNA hypermethylation in colorectal cancer

### SUPPLEMENTARY TABLES

**Supplementary Table 1: Gene names and known function**

|                | <i>Name</i>                             | <i>Function</i>                                           |
|----------------|-----------------------------------------|-----------------------------------------------------------|
| <i>ALX4</i>    | Aristaless-like homeobox 1              | Skull and limb development                                |
| <i>APC</i>     | Adenomatous polyposis                   | Cellular adhesion and $\beta$ -catenin regulation         |
| <i>BMP3</i>    | Bone morphogenetic protein 3            | Bone formation                                            |
| <i>BNC1</i>    | Basonuclin 1                            | Regulates proliferation and rRNA transcription            |
| <i>BRCA1</i>   | Breast cancer 1                         | DNA repair and gene transcription                         |
| <i>CDKN2A</i>  | Cyclin dependent kinase inhibitor 2A    | Cell-cycle regulation                                     |
| <i>HIC1</i>    | Hypermethylated in cancer 1             | Gene transcription and cellular division                  |
| <i>HLTF</i>    | Helicase like transcription factor      | Gene transcription and cellular division                  |
| <i>MGMT</i>    | O-6-methylguanine-DNA methyltransferase | DNA repair                                                |
| <i>MLH1</i>    | Mutl homolog 1                          | DNA repair                                                |
| <i>NDRG4</i>   | N-myc downstream-regulated gene 4       | Cell-cycle progression and regulation of mitotic signals  |
| <i>NPTX2</i>   | Neuronal pentraxin 2                    | Synapse formation and non-apoptotic cell death            |
| <i>NEUROG1</i> | Neurogenin 1                            | Neuronal differentiation                                  |
| <i>OSMR</i>    | Oncostatin M receptor                   | Cytokine receptor for cell signalling                     |
| <i>PHACTR3</i> | Phosphatase and actin regulator 3       | Nuclear scaffolding of proliferating cells                |
| <i>PPENK</i>   | Preproenkephalin                        | Synaptic signalling                                       |
| <i>RARB</i>    | Retinoic acid receptor beta             | Cellular signalling and retinoic acid binding             |
| <i>RASSF1A</i> | Ras association domain family member 1A | Cell-cycle regulation and DNA repair                      |
| <i>SDC2</i>    | Syndecan 2                              | Cellular adhesion, signalling, and cytoskeletal structure |
| <i>SEPT9</i>   | Septin 9                                | Cell-cycle regulation and cytokinesis                     |
| <i>SFRP1</i>   | Secreted frizzled related peptide 1     | Modulator of Wnt signalling                               |
| <i>SFRP2</i>   | Secreted frizzled related peptide 2     | Modulator of Wnt signalling                               |
| <i>SPG20</i>   | Spastic paraplegia 20                   | Regulates endosomal traffic and mitochondria function     |
| <i>SST</i>     | Somatostatin                            | Inhibitory hormone and regulator of endocrine system      |
| <i>TAC1</i>    | Tachykinin precursor 1                  | Neurotransmitting and vasodilation                        |
| <i>THBD</i>    | Thrombomodulin                          | Inhibition of haemostasis                                 |
| <i>TFPI2</i>   | Tissue factor pathway inhibitor 2       | Inhibition of haemostasis                                 |
| <i>VIM</i>     | Vimentin                                | Cell shape and integrity maintenance                      |
| <i>WIF1</i>    | Wnt inhibitory factor 1                 | Cell fate regulation in oncogenesis and embryogenesis     |
| <i>WNT5A</i>   | Wnt family member 5A                    | Cell fate regulation in oncogenesis and embryogenesis     |

Note. Gene names and known function have been cross-matched with the RefSeq database (<http://www.ncbi.nlm.nih.gov/refseq/>).

**Supplementary Table 2: Characteristics of gene specific primers and probes**

See Supplementary File 1

**Supplementary Table 3: Characteristics of the reference gene (*MEST*) primers and probes**

|                   | <i>Outer primers</i>      |       | <i>Inner primers</i>          |      | <i>Probes</i>                | <i>Coordinates</i>       | <i>Accession no.</i> |
|-------------------|---------------------------|-------|-------------------------------|------|------------------------------|--------------------------|----------------------|
| <i>MEST U</i> (+) | GGTTTAAAAG<br>TTCGGTGTATT | (130) | TGTTGTGGTAA<br>TTAGTATATTT    | (83) | CGCGAGTAGTTGTG<br>TTTGTTCGCG | 130492052 –<br>130492181 | NC_000007.14         |
| (-)               | CCIAACAATA<br>CAACCACTCC  |       | CAACCACTCAA<br>CATACTACA      |      |                              |                          |                      |
| <i>MEST M</i> (+) | GCGATGGGTTT<br>GTGCGC     | (130) | CGACGTTTTAG<br>TTTCGAGTC      | (86) | CGATCGGTGGTC<br>GGTTCGATCG   | 130486225 –<br>130486355 | NC_000007.14         |
| (-)               | GAAAAACCGA<br>TTACGCATACG |       | CGCTTCCTAAAA<br>CCAAAAATTCTCG |      |                              |                          |                      |

Note. The primer and probe sequences for the methylation specific polymerase chain reaction with the individual amplicon sizes represented as number of base pairs in brackets to the right of the outer/inner primers respectively. The NCBI accession number (no.) and the remapping coordinates of the amplified promoter regions are also presented. (+) Forward primer, (-) Reverse primer. (*U*) indicates the un-methylated version of *MEST*, (*M*) indicates the methylated version of *MEST*.
